# Supplementary material for: Nonlinear amplification of circular dichroism activity upon cyclodimerization of a chiral saddle-shaped porphyrin
Source: Royal Society of Chemistry journal article supplement (doi:10.1039/b209789c), 2002-12-19
Supplement: b209789c.doc [file b209789c.doc]

## Supplementary Information

Nonlinear amplification of circular dichroism activity upon cyclodimerization of a chiral saddle-shaped porphyrin

**Yukitami Mizuno and Takuzo Aida***

Department of Chemistry and Biotechnology, School of Engineering,

*The University of Tokyo, 7-3-1 Hongo, Bunkyo-ku, Tokyo 113-8656, Japan.*

(Total 10 pages including this cover page)

#### Table of Contents

1. Experimental Procedures 2

2. Synthesis of precursor porphyrins **7–9** and cyclic dimer **2**. 3

3. 1H NMR spectra of **2** and its mandelate complexes in CDCl3 (**Figure S1**) 8

4. Circular dichroism (CD) spectrum of a mandelate complex of **2**

after dissolved in acetic acid (**Figure S2**) 9

5. References 10

**1. Experimental Procedures.**

**General:** NMR spectroscopy was performed in CDCl3 at 25 °C or 50 °C on a JEOL type GSX-270 spectrometer operating at 270 MHz, where the chemical shifts were determined with respect to CHCl3 (** 7.28). Electronic absorption spectra were recorded on a JASCO type V-560 spectrophotometer. FAB-MS spectra were measured on a JEOL type JMS-HX110 spectrometer using a 3-nitrobenzyl alcohol as a matrix. MALDI-TOF-MS spectra were recorded on a Bruker type ProteinTof mass spectrometer using 9-nitroanthracene (9NA) as a matrix.

**Materials:** CH2Cl2, CHCl3, 1,2-dichloroethane (DCE), and *N*,*N*-dimethylformamide (DMF) were distilled from CaH2 under N2. Ethylene glycol was distilled from CaSO4 under reduced pressure. These solvents were stored under N2. Tetrahydrofuran (THF) was refluxed over sodium benzophenone ketyl under Ar and distilled just before use. BF3 etherate (BF3•OEt) and benzaldehyde were distilled under reduced pressure and stored under N2. 18-Crown-6 ether was recrystallized from MeCN, dried overnight under reduced pressure, and then stored under N2. K2CO3 was kept in an oven at 130 °C. *p*-Chloranil, Ni(OAc)2•4H2O, ,’-dibromo-*p*-xylylene, MeOH, EtOH, and AcOH were used as received.

**2. Synthesis of precursor porphyrins 7–9 and cyclic dimer 2.**

**Porphyrin 7:** To a CH2Cl2 (5 mL) solution of a mixture of 5-(2’,6’-dimethoxyphenyl)-2,3,7,8-tetramethylpyrromethane (**5**, 150.3 mg, 0.4441 mmol), 3-(4’-toluenesulfonyloxy)-benzaldehyde (**6**, 151.6 mg, 0.5487 mmol), and a dehydrating agent such as molecular sieves 4A (0.7 g) was added BF3•OEt (0.010 mL, 0.080 mmol), and the mixture was stirred under N2 at room temperature.**[[1]](#endnote-2)** After 3-h stirring, *p*-chloranil (166.5 mg, 0.6772 mmol) was added to the reaction mixture. After stirred for 3 h, molecular sieves 4A were removed by filtration, and a black filtrate was shaken with aqueous Na2S2O3 and extracted with CH2Cl2. The combined extract was washed with brine, and an organic phase separated was dried over Na2SO4 and evaporated to dryness. Then, the residue was chromatographed on alumina with CHCl3/hexane (5:1) containing 1% Et3N as eluent, where the second green band was collected and evaporated to give **7** in 11% yield (55.7 mg).

1H NMR (25 °C): ** 8.07–7.23 (m, 22H, Ar-H in porphyrin and Ts), 3.73 (s, 12H, OCH3),　2.27 (s, 6H, CH3 in Ts), 2.05 (s, 12H, pyrrole-**-CH3 closed to C6H3(OMe)2), 1.74 (s, 12H, pyrrole-**-CH3 closed to C6H5). FAB-MS calcd for C70H67N4O10S2 (MH+): 1187; obsd: 1187.

**Porphyrin 8:** To a CHCl3 (20 mL) solution of **7** was added a AcOH/MeOH (1/9) solution of Ni(OAc)2/4H2O(1.0041 g, 4.0351 mmol), and the mixture was refluxed under N2 for 3 h, and then evaporated to dryness under reduced pressure.[[2]](#endnote-3) The residue was poured into CHCl3, and the resulting suspension was filtered to remove an insoluble fraction (Ni(OAc)2). A black filtrate, thus obtained, was chromatographed on silica gel with CHCl3 containing 1% AcOEt as eluent, where the first brown band was collected and evaporated to dryness, to give a Ni complex of **7** in 50% yield (52 mg).

1H NMR (25 °C): ** 7.81 (d, 2H, *J* = 8.1 Hz, 6-H in C6H4(OTs)), 7.77 (d, 4H, *J* = 8.6 Hz, Ar-*o*-H in Ts), 7.61 (t, 2H, *J* = 8.3 Hz, *p*-H in C6H3(OMe)2), 7.54 (s, 2H, 2-H in C6H4(OTs)), 7.52 (m, 2H, 5-H in C6H4(OTs)), 7.38 (dd, 2H, *J* = 7.6, 1.7 Hz, 4-H in C6H4(OTs)), 7.23 (d, 4H, *J* = 8.6 Hz, Ar-*m*-H in Ts), 6.84 (d, 4H, *J* = 8.1 Hz, Ar-*m*-H in C6H3(OMe)2), 3.68 (s, 12H, OCH3), 2.30 (s, 6H, CH3 in Ts), 2.00 (s, 12H, pyrrole-**-CH3 closed to C6H3(OMe)2), 1.71 (s, 12H, pyrrole-**-CH3 closed to C6H5). FAB-MS calcd for C70H64N4O10S2Ni (M+): 1242; obsd: 1242.

To a THF/EtOH (2 mL/2 mL) solution of the Ni complex of **7** (52.5 mg, 0.0422 mmol) was added NaOH (100 mg, 2.5 mmol), and the mixture was refluxed for 3 h.[[3]](#endnote-4) The reaction mixture was poured into water and extracted with CH2Cl2. The organic phase separated was washed with brine, dried over anhydrous Na2SO4, and evaporated to dryness under reduced pressure. Then, the residue were chromatographed on silica gel with CH2Cl2 as eluent, where the second brown band was collected and evaporated to dryness, to give **8** in 89% yield (35.2 mg).

1H NMR (25 °C): ** 7.59 (t, 2H, *J* = 8.6 Hz, Ar-*p*-H in C6H3(OMe)2), 7.53–7.41 (m, 6H, 2-/5-/6-H in C6H4(OH)), 7.10 (m, 2H, 4-H in C6H4(OH)), 6.86 (d, 4H, *J* = 8.1 Hz, Ar-*m*-H in C6H3(OMe)2), 3.67 (s, 12H, OCH3), 1.92 (s, 12H, pyrrole-**-CH3 closed to C6H3(OMe)2), 1.71 (s, 12H, pyrrole-**-CH3 closed to C6H5). FAB-MS calcd for C56H52N4O6Ni (M+): 934; obsd: 934.

**Porphyrin 9:** **8** (11.0 mg, 0.0118 mmol),,’-dibromo-*p*-xylylene (70.3 mg, 0.266 mmol), and 18-crown-6 ether (6.0 mg, 0.023 mmol) were dissolved in dry THF (2 mL) containing K2CO3 (11.7 mg, 0.0847 mmol), and the mixture was refluxed under N2 for 12 h. The reaction mixture was evaporated to dryness, and the residue was chromatographed on silica gel with CHCl3 as eluent, where the first brown band was collected and evaporated to dryness, to give **9** in 76% yield (11.6 mg).

1H NMR (25 °C): ** 7.61 (t, 2H, *J* = 8.3 Hz, Ar-*p*-H in C6H3(OMe)2), 7.57–7.32 (m, 16H, Ar-H in C6H4(BrCH2C6H4CH2)), 6.88 (d, 4H, *J* = 8.6 Hz, Ar-*m*-H in C6H3(OMe)2), 5.20 (s, 4H, ArOCH2), 4.01 (s, 4H, CH2Br), 3.67 (s, 12H, OCH3), 2.01 (s, 12H, pyrrole-**-CH3 closed to C6H3(OMe)2), 1.82 (s, 12H, pyrrole-**-CH3 closed to C6H5). FAB-MS calcd for C72H67N4O6Br2Ni (MH+): 1299; obsd: 1301.

**Cyclic dimer 2:**  **8** (70.7 mg, 0.0756 mmol) and **9** (98.7 mg, 0.0758 mmol) were dissolved in dry DMF (160 mL) containing K2CO3 (69.1 mg, 0.500 mmol), and the mixture was stirred for 28 h under N2 at room temperature. The reaction mixture was evaporated to dryness, and the residue was chromatographed on silica gel with CH2Cl2 as eluent, where the first brown band was collected and evaporated to dryness, to give a Ni complex of cyclic dimer **2** in 33% yield (51.9 mg).

1H NMR (50 °C): ** 7.5–6.3 (br, 36H, Ar-H in Ni complex of **2**), 5.2 (s, 8H, CH2), 3.2 (br, 24H, OCH3), 1.9 (s, 24H, pyrrole-**-CH3 closed to C6H3(OMe)2), 1.7 (s, 24H, pyrrole-**-CH3 closed to C6H5). MALDI-TOF-MS calcd for C128H116N8O12Ni2 (M+): 2073; obsd: 2073.

To a CHCl3 (1.10 mL) solution of the Ni complex of cyclic dimer **2** was added 35% hydrochloric acid (0.2 mL, 2 mmol), and the mixture was stirred at room temperature.[[4]](#endnote-5) After 3 h, the reaction mixture was neutralized with aqueous NaHCO3 and extracted with CHCl3. The organic phase separated was evaporated under reduced pressure, and the residue was chromatographed on alumina with CH2Cl2 containing 1% Et2NH as eluent, where the green band was collected and evaporated to dryness, to give **2** in 37% yield (2.63 mg).

1H NMR (25 °C): ** 8.0–6.7 (m, 36H, Ar-H in **2**), 5.4–5.1 (m, 8H, ArOCH2), 3.8–3.2 (m, 24H, OCH3), 2.0–1.3 (m, 48H, pyrrole-**-CH3). HRMS (FAB) calcd for C128H121N8O12 (MH+): 1961.9104; obsd: 1961.9093. UV/vis (DCE): **max, nm: 440 (** = 3.2 x 105 dm3 mol-1 cm-1), 542, and 685.

**3. 1H NMR spectra of 2 and its mandelate complexes in CDCl3.**

**Figure S1** 1H NMR spectra of cyclic dimer **2** and its mandelate complexes in CDCl3 at 25 °C. The assignment was made on the basis of the 1H NMR spectrum of the bis(mandelate) complex of **1**.

**4. Circular dichroism (CD) spectrum of a mandelate complex of 2 after dissolved in acetic acid.**

**Figure S2** Circular dichroism (CD) spectrum in acetic acid at 23 °C of a protonated form of cyclic dimer **2**, derived from the (*S*)-mandelate complex formed at [(S)-MA]/[**2**] = 2.

**5. References**

1. . Y. Furusho, T. Kimura, Y. Mizuno and T. Aida, *J. Am. Chem. Soc.*, 1997, **119**, 5267; Y. Mizuno, T. Aida and K. Yamaguchi, *J. Am. Chem. Soc.*, 2000, **122**, 5278. [↑](#endnote-ref-2)
2. . M. L. Wolfrom, E. W. Koos and H. B. Bhat, *J. Org. Chem.*, 1967, **32**, 1058. [↑](#endnote-ref-3)
3. . J. W. Buchler, In *The Porphyrins*; D. Dolphin, Ed.; Academic Press: New York, 1978, vol.1, pp. 389. [↑](#endnote-ref-4)
4. . J. W. Buchler, In *Porphyrins and Metalloporphyrins*; K. M. Smith, Ed.; Elsevier: Amsterdam, 1975, 199. [↑](#endnote-ref-5)
